# Supplementary material for: Ostomy and Continent Diversion Patient Bill of Rights: Research Validation of Standards of Care
Source: PubMed Central journal article supplement — J Wound Ostomy Continence Nurs. 2022 May 6;49(3):251–60. doi: 10.1097/WON.0000000000000876 (PMC9093730; doi:10.1097/won.0000000000000876), 2022-05-06
Supplement: wocn-49-251-s002.pdf [file wocn-49-251-s002.pdf]

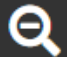

# WHAT'S IN YOUR WALLET?

## Utilizing UOAA's Patient Bill of Rights, Nurses Can Act as Influencers for Ostomy Patients

### USE OF THE PBOR CAN IMPROVE PATIENT OUTCOMES, PATIENT SATISFACTION AND ULTIMATELY QUALITY OF LIFE FOR THIS UNDERSERVED POPULATION.

United Ostomy Associations of America (UOAA) revised the "Ostomy and Continent Diversion Patient Bill of Rights" (PBOR) in 2017 to empower patients to be self-advocates and drive change. The PBOR is a research-driven tool for patients and clinicians to promote best in practice in all health care settings and serves as a guide to deliver high-quality care. Nurses can carry the wallet size version of the PBOR to serve as a daily reminder that they are advocates for and with their patients to drive needed changes.

#### EXAMPLES CONTAINED IN THE PBOR:

- Pre-op stoma site marking
- Prior to discharge ensure patient is educated about dietary/fluid needs specific to ostomy type and the relationship for prevention of obstruction and dehydration
- Anticipate the need for outpatient follow up care at time of discharge

#### UOAA RAISED AWARENESS AMONG NURSES SO THAT THEY COULD ACT AS INFLUENCERS TO:

- Compare current standards of practice to identify gaps in care
- Advocate for PBOR best in practice standards in their healthcare setting
- Work with their hospital administrators to hire more WOC nurses and to start outpatient ostomy clinics



21,000+ people received the PBOR wallet card



2,284 views of the PBOR



1,056 downloads of both the full-size & wallet versions



538 downloads of nursing practices

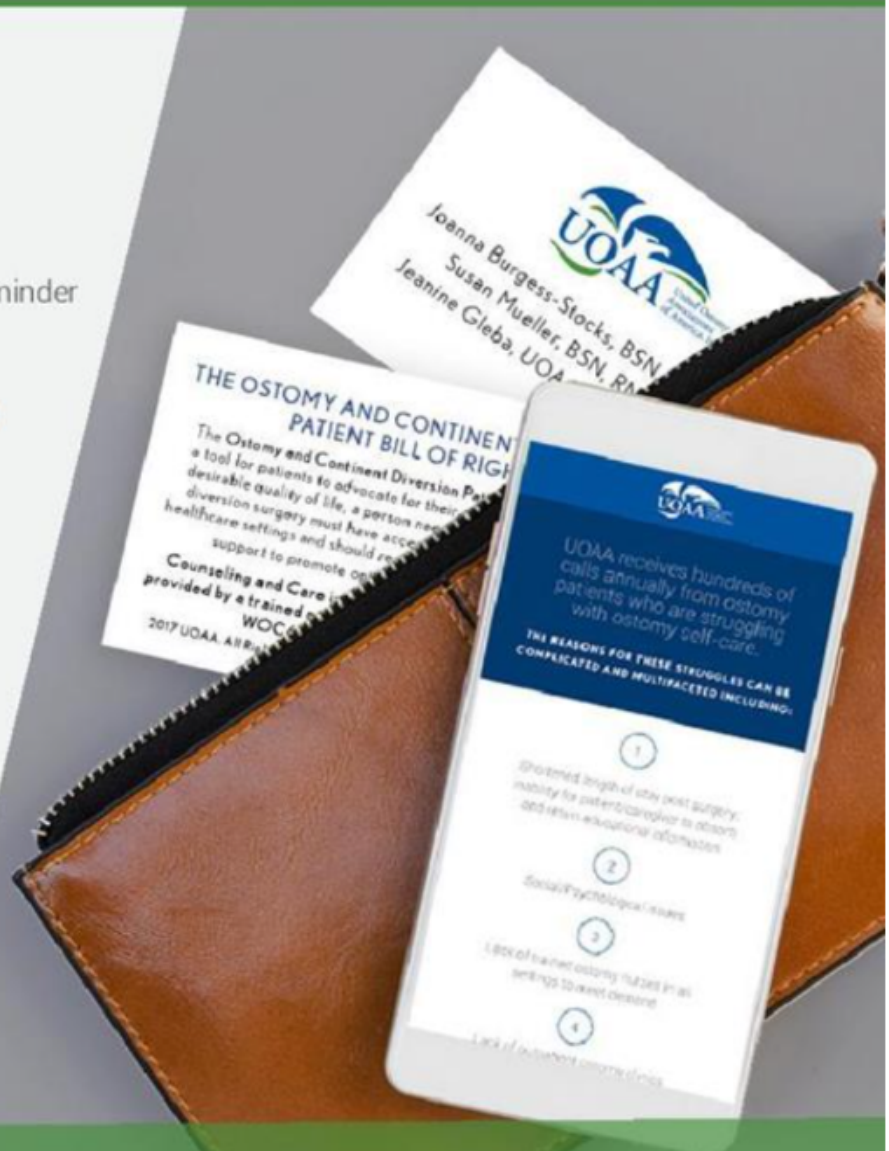

**References:** Atanovitch, S., Sharp, R., & Haidjar-Morano, L. (2010) Quality of Life for Patients Living With Ostomies: Influence of Contact With and Ostomy Nurse. *Journal of Wound, Ostomy and Continence Nursing*, 37(6) 649-653, November/December 2010. Santos, V., Augusto, F., & Gomboski, G. (2016) Health-Related Quality of Life in Person With Ostomies Managed in an Outpatient Care Setting. *Journal of Wound, Ostomy and Continence Nursing*, 43(2) 158-164, March/April 2016. Prinz, A., Colwell, J., Perkins, J., et al. (2014) Discharge planning for a patient with a new ostomy. *Best practice for clinicians*. WOCN Society Wound, Ostomy and Continence Nurses Society. (2014). WOCN Society and ASCRS Position Statement on Preoperative Stoma Site Marking for Patients Undergoing Colectomy or Ileostomy Surgery. Mt Laurel, NJ: Author United Ostomy Associations of America. (2017). Ostomy and Continent Diversion Patient Bill of Rights (PBOR). United Ostomy Associations of America, Inc. Accessed October 2, 2018.

## SO WHAT'S IN YOUR WALLET?
